# Supplementary material for: Identification of a novel ceRNA network related to prognosis and immunity in HNSCC based on integrated bioinformatic investigation
Source: Sci Rep. 2022 Oct 20;12:17560. doi: 10.1038/s41598-022-21473-0 (PMC9584951; doi:10.1038/s41598-022-21473-0)
Supplement: Supplementary file 7 — Supplementary Table 3. [file 41598_2022_21473_MOESM7_ESM.xlsx]

## Sheet: lncRNA.diff
Differentially expressed lncRNAs (DELs)
symbol	group	baseMean	logFC	lfcSE	stat	PValue	FDR
AC114956.2	long_non_coding	84.8403	3.34276	0.195887	17.0647	2.71624e-65	2.60216e-62
FOXD2-AS1	long_non_coding	167.261	2.39557	0.144044	16.6308	4.16882e-62	3.15294e-59
LINC00941	long_non_coding	151.418	3.97604	0.259195	15.3399	4.1357e-53	1.29196e-50
ZFPM2-AS1	long_non_coding	160.149	4.15094	0.285073	14.561	4.97306e-48	8.40739e-46
U62317.2	long_non_coding	320.406	2.85422	0.196557	14.5211	8.9039e-48	1.45397e-45
ZNF710-AS1	long_non_coding	266.038	-2.46451	0.171264	-14.3901	5.97164e-47	8.84664e-45
AL358334.2	long_non_coding	122.169	3.19384	0.222283	14.3684	8.1737e-47	1.17456e-44
AC103702.2	long_non_coding	229.733	5.03971	0.36187	13.9268	4.35147e-44	4.53121e-42
AC002384.1	long_non_coding	149.411	4.16101	0.300393	13.8519	1.23909e-43	1.22798e-41
DUXAP8	long_non_coding	230.489	3.49525	0.263245	13.2775	3.12494e-40	2.35107e-38
TM4SF19-AS1	long_non_coding	101.506	2.7302	0.207729	13.1431	1.86369e-39	1.3324e-37
GSEC	long_non_coding	132.177	2.05219	0.159338	12.8795	5.87021e-38	3.60491e-36
LINC01615	long_non_coding	251.206	3.29565	0.267309	12.329	6.32108e-35	3.06872e-33
AC012073.1	long_non_coding	81.5089	1.48067	0.123108	12.0274	2.55182e-33	1.04771e-31
MYOSLID	long_non_coding	197.696	2.83805	0.237421	11.9537	6.2118e-33	2.47954e-31
AC026401.3	long_non_coding	755.369	1.39113	0.122498	11.3564	6.89556e-30	2.12183e-28
AC108676.1	long_non_coding	268.809	3.80503	0.335997	11.3246	9.91684e-30	3.02558e-28
AL365356.5	long_non_coding	128.438	3.03157	0.268886	11.2745	1.75274e-29	5.2255e-28
AC099850.3	long_non_coding	169.566	1.55231	0.138987	11.1687	5.80302e-29	1.66114e-27
AL365181.3	long_non_coding	389.96	3.21317	0.292463	10.9866	4.43487e-28	1.18455e-26
AL357033.4	long_non_coding	202.581	-1.98468	0.181882	-10.9119	1.01104e-27	2.60836e-26
CASC9	long_non_coding	465.008	3.64008	0.335361	10.8542	1.90423e-27	4.83458e-26
MIR9-3HG	long_non_coding	449.325	3.35021	0.310966	10.7736	4.58913e-27	1.12728e-25
LINC01679	long_non_coding	270.876	1.89922	0.176349	10.7696	4.78905e-27	1.17438e-25
AL161431.1	long_non_coding	2101.91	3.24335	0.305251	10.6252	2.27569e-26	5.21558e-25
LINC00519	long_non_coding	173.989	2.39922	0.231879	10.3468	4.32485e-25	8.75326e-24
AC104825.2	long_non_coding	153.781	-1.67204	0.163371	-10.2346	1.38747e-24	2.69431e-23
HAGLR	long_non_coding	327.11	2.2144	0.219911	10.0695	7.53515e-24	1.35013e-22
LINC00174	long_non_coding	576.096	1.82503	0.182079	10.0233	1.20412e-23	2.1231e-22
AC009948.1	long_non_coding	343.511	1.05094	0.105154	9.99434	1.61365e-23	2.79375e-22
AL512274.1	long_non_coding	807.829	-2.13663	0.215102	-9.93309	2.98847e-23	5.07292e-22
AC093895.1	long_non_coding	84.6324	3.15643	0.318297	9.91661	3.52534e-23	5.94591e-22
LINC01232	long_non_coding	196.801	1.30347	0.131768	9.89218	4.50106e-23	7.51222e-22
DLX6-AS1	long_non_coding	115.308	2.37327	0.241505	9.82703	8.61247e-23	1.39371e-21
LINC01116	long_non_coding	244.592	2.16276	0.221191	9.77781	1.40215e-22	2.20689e-21
AL691432.2	long_non_coding	246.428	-1.26222	0.129626	-9.73744	2.08753e-22	3.21865e-21
CBR3-AS1	long_non_coding	150.012	-1.20938	0.125547	-9.63287	5.80852e-22	8.70369e-21
SLC16A1-AS1	long_non_coding	223.187	1.13641	0.118174	9.61638	6.81875e-22	1.01314e-20
RNF139-AS1	long_non_coding	67.5981	1.34452	0.140291	9.58382	9.35175e-22	1.37127e-20
U62317.3	long_non_coding	565.036	1.75343	0.183268	9.56755	1.09473e-21	1.59546e-20
AL024507.2	long_non_coding	67.1456	1.32292	0.141042	9.37962	6.62111e-21	9.0701e-20
TMPO-AS1	long_non_coding	190.397	1.36471	0.146723	9.30131	1.38724e-20	1.85094e-19
C1RL-AS1	long_non_coding	211.993	1.34453	0.145152	9.26291	1.98939e-20	2.6036e-19
AC018521.5	long_non_coding	162.174	-1.20596	0.130513	-9.24021	2.46022e-20	3.17926e-19
MIAT	long_non_coding	512.701	2.23991	0.245042	9.14093	6.19199e-20	7.73729e-19
AC004943.2	long_non_coding	223.2	1.11979	0.123078	9.09821	9.1833e-20	1.12406e-18
LBX2-AS1	long_non_coding	234.532	1.26157	0.139709	9.03001	1.71651e-19	2.0521e-18
HOXC13-AS	long_non_coding	194.946	2.43985	0.272729	8.94607	3.68372e-19	4.2724e-18
NKILA	long_non_coding	142.751	1.94613	0.218644	8.90093	5.53816e-19	6.32619e-18
KCNMB2-AS1	long_non_coding	177.335	2.25079	0.256784	8.76532	1.86243e-18	2.03521e-17
AC078883.1	long_non_coding	73.7894	1.16214	0.132746	8.75459	2.04838e-18	2.22825e-17
AC092902.2	long_non_coding	108.381	1.67477	0.192344	8.70714	3.11637e-18	3.32953e-17
AC025171.1	long_non_coding	250.64	1.01069	0.117098	8.63113	6.07501e-18	6.33511e-17
LINC00839	long_non_coding	263.284	2.49824	0.292241	8.54857	1.24621e-17	1.25936e-16
DLEU2	long_non_coding	230.377	1.0668	0.126149	8.45672	2.75012e-17	2.71797e-16
BBOX1-AS1	long_non_coding	292.129	1.60152	0.190379	8.41227	4.0216e-17	3.89949e-16
LINC00958	long_non_coding	1740.16	1.62758	0.193635	8.40541	4.26361e-17	4.12302e-16
NCK1-AS1	long_non_coding	208.676	1.15705	0.137707	8.40227	4.37933e-17	4.22639e-16
LINC01410	long_non_coding	101.287	1.16888	0.143955	8.11972	4.67245e-16	4.04965e-15
DLGAP1-AS2	long_non_coding	137.724	1.6706	0.20657	8.08734	6.09804e-16	5.24096e-15
HCP5	long_non_coding	3889.13	1.23663	0.155821	7.93624	2.08399e-15	1.71223e-14
IGFL2-AS1	long_non_coding	379.779	2.62682	0.331457	7.92505	2.28062e-15	1.86844e-14
BLACAT1	long_non_coding	211.293	1.45338	0.185747	7.82449	5.09721e-15	4.05576e-14
MSC-AS1	long_non_coding	418.198	1.58041	0.202305	7.81204	5.62718e-15	4.46755e-14
AC093010.3	long_non_coding	284.41	-1.20933	0.155899	-7.7571	8.68933e-15	6.78617e-14
KCNQ1OT1	long_non_coding	140.877	1.25066	0.161987	7.7207	1.15694e-14	8.91902e-14
STARD4-AS1	long_non_coding	84.2817	1.4115	0.184156	7.6647	1.79253e-14	1.35429e-13
LINC00957	long_non_coding	98.9923	-1.22754	0.162392	-7.55912	4.0582e-14	2.97532e-13
LINC00491	long_non_coding	103.704	2.1014	0.278612	7.54238	4.61456e-14	3.36264e-13
PART1	long_non_coding	207.985	-2.25871	0.302267	-7.47258	7.86391e-14	5.58598e-13
SLC2A1-AS1	long_non_coding	78.983	1.3123	0.176146	7.45008	9.32853e-14	6.57113e-13
AL391244.3	long_non_coding	100.998	1.0448	0.140246	7.44973	9.35306e-14	6.58518e-13
AC098864.1	long_non_coding	117.432	1.92926	0.26488	7.28354	3.25178e-13	2.17948e-12
AL591845.1	long_non_coding	166.185	1.37049	0.188556	7.26833	3.63968e-13	2.42589e-12
AL441992.1	long_non_coding	144.534	1.00528	0.138859	7.23956	4.5015e-13	2.96456e-12
MIR4435-2HG	long_non_coding	1132.87	1.04816	0.145423	7.20765	5.69246e-13	3.69804e-12
AC239868.2	long_non_coding	252.172	1.05256	0.146683	7.17572	7.19275e-13	4.61428e-12
LINC01980	long_non_coding	127.713	2.95299	0.413328	7.14441	9.03829e-13	5.72504e-12
C5orf66	long_non_coding	110.503	-1.16963	0.16463	-7.10458	1.20689e-12	7.53388e-12
GATA2-AS1	long_non_coding	109	1.67359	0.237301	7.05259	1.75618e-12	1.07986e-11
AC144831.1	long_non_coding	132.509	-1.44583	0.205309	-7.04221	1.89214e-12	1.15998e-11
LINC01355	long_non_coding	117	1.35597	0.193526	7.00668	2.44035e-12	1.48278e-11
PSMG3-AS1	long_non_coding	167.126	-1.02314	0.146302	-6.99335	2.6839e-12	1.6239e-11
AC091182.2	long_non_coding	112.049	1.63864	0.23481	6.97858	2.98168e-12	1.79726e-11
C5orf66-AS1	long_non_coding	198.899	-2.26199	0.324266	-6.97573	3.04295e-12	1.83189e-11
LINC02560	long_non_coding	233.153	-1.79113	0.263205	-6.80505	1.01011e-11	5.7441e-11
SNHG14	long_non_coding	520.499	-1.43879	0.213914	-6.72601	1.74379e-11	9.6601e-11
MAGI2-AS3	long_non_coding	225.906	-1.26524	0.1899	-6.66269	2.68855e-11	1.46955e-10
CASC15	long_non_coding	204.154	1.26032	0.191786	6.5715	4.98111e-11	2.64225e-10
LINC01605	long_non_coding	494.355	1.43367	0.218642	6.55715	5.48462e-11	2.8997e-10
LINC00707	long_non_coding	340.875	2.15875	0.329766	6.54633	5.89688e-11	3.10624e-10
AP003356.1	long_non_coding	199.213	1.42063	0.217361	6.53578	6.32776e-11	3.32103e-10
AC083843.2	long_non_coding	125.446	1.0724	0.165739	6.47045	9.77122e-11	5.01294e-10
AC068888.1	long_non_coding	148.434	-1.02599	0.158986	-6.4533	1.0944e-10	5.58272e-10
AP002761.4	long_non_coding	1344.98	-1.17983	0.184487	-6.39521	1.6033e-10	8.0389e-10
SNHG26	long_non_coding	196.361	1.08811	0.172611	6.30382	2.90392e-10	1.41647e-09
MIR99AHG	long_non_coding	108.888	-1.49102	0.239187	-6.23369	4.55584e-10	2.16708e-09
AL035661.1	long_non_coding	404.308	-1.32758	0.2174	-6.10662	1.01762e-09	4.63638e-09
RUSC1-AS1	long_non_coding	135.476	1.00068	0.165682	6.03979	1.54312e-09	6.88869e-09
MBNL1-AS1	long_non_coding	178.406	-1.13216	0.187677	-6.03248	1.61465e-09	7.18575e-09
LINC02298	long_non_coding	83.6513	1.1443	0.190391	6.01027	1.8521e-09	8.16401e-09
WFDC21P	long_non_coding	2065.06	-1.72498	0.287556	-5.99875	1.9884e-09	8.72735e-09
AL365277.1	long_non_coding	103.649	1.02375	0.171423	5.97206	2.34282e-09	1.0205e-08
A1BG-AS1	long_non_coding	74.2621	1.06388	0.182421	5.832	5.47655e-09	2.27385e-08
AL078590.2	long_non_coding	227.435	1.64198	0.284378	5.77393	7.74444e-09	3.15173e-08
MIR100HG	long_non_coding	365.37	-1.04189	0.184286	-5.65364	1.57083e-08	6.14727e-08
AL513318.2	long_non_coding	313.766	1.88093	0.333471	5.64045	1.6961e-08	6.60872e-08
BAALC-AS1	long_non_coding	141.94	1.02751	0.182496	5.63032	1.79873e-08	6.99155e-08
MELTF-AS1	long_non_coding	124.261	1.16384	0.212543	5.47576	4.35643e-08	1.62181e-07
ZNF667-AS1	long_non_coding	154.797	-1.2439	0.230452	-5.39764	6.75225e-08	2.45894e-07
PICSAR	long_non_coding	260.166	1.87102	0.358796	5.21472	1.84098e-07	6.30328e-07
AC005035.1	long_non_coding	215.942	1.26428	0.293858	4.30237	1.68981e-05	4.4295e-05
LINC00052	long_non_coding	11990.3	-1.36331	0.330681	-4.12274	3.74386e-05	9.3434e-05
MIR31HG	long_non_coding	136.721	1.16871	0.288644	4.04897	5.14435e-05	0.000125658
LINC01527	long_non_coding	424.78	1.12692	0.375801	2.99872	0.00271118	0.00503616
